# Supplementary material
Source: PubMed Central journal article supplement (PMC6143073)
Supplement: jamacardiol-3-682-s001.pdf [file jamacardiol-3-682-s001.pdf]

## Supplementary Online Content

Douglas PS, Rzeszut AK, Merz CNB, Duvernoy CS, Lewis SJ, Walsh MN, Gillam L; for the American College of Cardiology Task Force on Diversity and Inclusion and American College of Cardiology Women in Cardiology Council. Career preferences and perceptions of cardiology among US internal medicine trainees: factors influencing cardiology career choice. *JAMA Cardiol*. Published online May 30, 2018. doi:10.1001/jamacardio.2018.1279.

**eTable 1.** Career Choices of Those Not Selecting Cardiology

**eTable 2.** Importance of Factors in Professional Development

**eTable 3.** Agreement with Perceptions of the Cardiology Field

**eAppendix.** Internal Medicine Residents Survey – 2009-2010

This supplementary material has been provided by the authors to give readers additional information about their work.

eTable 1: Career Choices of Those Not Selecting Cardiology

|                                         | All respondents | Cardiology Choice          |                               |                                     | P value |
|-----------------------------------------|-----------------|----------------------------|-------------------------------|-------------------------------------|---------|
|                                         |                 | Current Cardiology (n=267) | Considered Cardiology (n=312) | Never considered cardiology (n=542) |         |
| Allergy and immunology                  | 1.2%            | 0.0%                       | 1.3%                          | 1.7%                                | 0.113   |
| Cardiovascular disease                  | 19.2%           | 80.1%                      | 0.0%                          | 0.0%                                | 0.000   |
| Clinical cardiac electrophysiology      | 2.3%            | 9.7%                       | 0.0%                          | 0.0%                                | 0.000   |
| Critical care medicine                  | 5.3%            | 0.0%                       | 9.3%#                         | 5.6%                                | 0.000   |
| Endocrinology, diabetes, and metabolism | 3.0%            | 0.0%                       | 3.2%                          | 4.3%                                | 0.003   |
| Gastroenterology                        | 9.3%            | 0.0%                       | 12.9%                         | 11.9%                               | 0.000   |
| General Internal Medicine               | 9.3%            | 0.0%                       | 9.6%                          | 13.7%                               | 0.000   |
| Geriatric medicine                      | 1.5%            | 0.0%                       | 1.6%                          | 2.2%                                | 0.053   |
| Hematology                              | 3.0%            | 0.0%                       | 3.2%                          | 4.3%                                | 0.003   |
| Hospice and palliative medicine         | 0.4%            | 0.0%                       | 1.0%                          | 0.4%                                | 0.209   |
| Infectious disease                      | 5.4%            | 0.0%                       | 5.1%                          | 8.2%                                | 0.000   |
| Interventional cardiology               | 2.4%            | 10.1%                      | 0.0%                          | 0.0%                                | 0.000   |
| Medical oncology                        | 7.8%            | 0.0%                       | 8.4%                          | 11.3%                               | 0.000   |
| Nephrology                              | 4.1%            | 0.0%                       | 8.0%#                         | 3.9%                                | 0.000   |
| Primary Care                            | 4.5%            | 0.0%                       | 2.6%##                        | 7.8%                                | 0.000   |
| Pulmonary disease                       | 2.2%            | 0.0%                       | 4.2%                          | 2.2%                                | 0.003   |
| Rheumatology                            | 2.0%            | 0.0%                       | 1.9%                          | 3.0%                                | 0.017   |
| Sleep medicine                          | 0.3%            | 0.0%                       | 0.3%                          | 0.4%                                | 0.620   |

|                                              |      |      |          |      |       |
|----------------------------------------------|------|------|----------|------|-------|
| Sports medicine                              | 0.2% | 0.0% | 0.3%     | 0.2% | 0.660 |
| Transplant hepatology                        | 0.3% | 0.0% | 0.0%     | 0.6% | 0.201 |
| Basic science                                | 2.0% | 0.0% | 2.3%     | 2.8% | 0.026 |
| Other medical subspecialty: (please specify) | 4.0% | 0.0% | 4.5%     | 5.8% | 0.000 |
| Non-medical                                  | 1.3% | 0.0% | 2.9%     | 1.1% | 0.009 |
| Undecided                                    | 8.5% | 0.0% | 17.0%### | 7.8% | 0.000 |

Statistical significance indicators are the same as Table 1.

eTable 2: Importance of Factors in Professional Development

|                                               | Factor Loading | All respondents (n=1123) | Sex         |               |              | Cardiology Choice            |                               |                                     |              |
|-----------------------------------------------|----------------|--------------------------|-------------|---------------|--------------|------------------------------|-------------------------------|-------------------------------------|--------------|
|                                               |                |                          | Men (n=625) | Women (n=494) | P value      | Current cardiology (n=267)   | Considered cardiology (n=312) | Never considered cardiology (n=542) | P value      |
| <b>Stable Hours (beta 0.45)</b>               |                | <b>3.43</b>              | <b>3.32</b> | <b>3.58</b>   | <b>0.000</b> | <b>3.11***##</b><br><b>#</b> | <b>3.54</b>                   | <b>3.53</b>                         | <b>0.000</b> |
| Having limited work hours during training     | 0.754          | 3.26                     | 3.21        | 3.32          | 0.073        | 3.04***##                    | 3.37                          | 3.30                                | 0.001        |
| The ability to have stable, predictable hours | 0.743          | 3.80                     | 3.73        | 3.89          | 0.008        | 3.47***##<br><b>#</b>        | 3.94                          | 3.89                                | 0.000        |
| The amount of overnight call                  | 0.739          | 3.56                     | 3.50        | 3.64          | 0.033        | 3.31***##<br><b>#</b>        | 3.64                          | 3.63                                | 0.000        |
| The ability to have a flexible schedule       | 0.709          | 3.66                     | 3.52        | 3.83          | 0.000        | 3.25***##<br><b>#</b>        | 3.80                          | 3.78                                | 0.000        |
| The ability to work part-time                 | 0.602          | 2.87                     | 2.59        | 3.22          | 0.000        | 2.46***##<br><b>#</b>        | 2.94                          | 3.03                                | 0.000        |
| <b>Family Friendly (beta 0.45)</b>            |                | <b>3.57</b>              | <b>3.45</b> | <b>3.73</b>   | <b>0.000</b> | <b>3.38***##</b><br><b>#</b> | <b>3.64</b>                   | <b>3.63</b>                         | <b>0.000</b> |
| Having time to spend with my family/children  | 0.771          | 4.26                     | 4.18        | 4.36          | 0.002        | 4.03***##                    | 4.28                          | 4.36                                | 0.000        |
| Having children in the next 5 years           | 0.728          | 3.55                     | 3.39        | 3.76          | 0.000        | 3.34#                        | 3.61                          | 3.63                                | 0.015        |

|                                                                                     |       |             |             |             |              |                        |             |             |              |
|-------------------------------------------------------------------------------------|-------|-------------|-------------|-------------|--------------|------------------------|-------------|-------------|--------------|
| Having family support nearby during training                                        | 0.681 | 3.78        | 3.69        | 3.89        | 0.005        | 3.73                   | 3.82        | 3.77        | 0.638        |
| Having a spouse with a flexible schedule                                            | 0.653 | 3.73        | 3.74        | 3.73        | 0.919        | 3.72                   | 3.78        | 3.71        | 0.648        |
| Fellowship program where taking maternity/paternity leave is accepted               | 0.590 | 3.30        | 2.95        | 3.71        | 0.000        | 2.89***##<br>#         | 3.43        | 3.43        | 0.000        |
| The desire for a “family-friendly” profession                                       | 0.514 | 3.82        | 3.71        | 3.95        | 0.001        | 3.53***##<br>#         | 3.87        | 3.93        | 0.000        |
| Program where on-site daycare is available                                          | 0.488 | 2.43        | 2.24        | 2.66        | 0.000        | 2.23**                 | 2.60        | 2.42        | 0.004        |
| <b>Female-Friendly (beta 0.23)</b>                                                  |       | <b>2.52</b> | <b>1.98</b> | <b>3.17</b> | <b>0.000</b> | <b>2.26***##<br/>#</b> | <b>2.65</b> | <b>2.57</b> | <b>0.000</b> |
| Having a supportive female role model or mentor in my field of choice               | 0.798 | 2.65        | 1.79        | 3.54        | 0.000        | 2.32***##              | 2.77        | 2.73        | 0.000        |
| The desire for a “female-friendly” profession                                       | 0.718 | 2.79        | 1.88        | 3.66        | 0.000        | 2.23***##<br>#         | 2.86        | 2.99        | 0.000        |
| Having a supportive role model or mentor of my race/ethnicity in my field of choice | 0.554 | 2.18        | 2.10        | 2.29        | 0.019        | 2.27                   | 2.33#       | 2.07        | 0.007        |
| <b>Positive Role Models (beta 0.19)</b>                                             |       | <b>4.39</b> | <b>4.33</b> | <b>4.46</b> | <b>0.000</b> | <b>4.37</b>            | <b>4.42</b> | <b>4.38</b> | <b>0.540</b> |
| Having received positive encouragement to pursue my field of choice                 | 0.759 | 4.41        | 4.34        | 4.51        | 0.001        | 4.43                   | 4.43        | 4.40        | 0.804        |
| Seeing role models in my field of choice who successfully balance their             | 0.708 | 4.39        | 4.32        | 4.48        | 0.004        | 4.35                   | 4.38        | 4.42        | 0.535        |

|                                                                                                                            |       |             |             |             |              |                |                 |             |              |
|----------------------------------------------------------------------------------------------------------------------------|-------|-------------|-------------|-------------|--------------|----------------|-----------------|-------------|--------------|
| professional and personal responsibilities                                                                                 |       |             |             |             |              |                |                 |             |              |
| Having a supportive role model or mentor in my field of choice                                                             | 0.622 | 4.45        | 4.43        | 4.48        | 0.243        | 4.55#          | 4.44            | 4.41        | 0.037        |
| Having fellowship programs in my field of choice appreciate the need to balance professional and personal responsibilities | 0.479 | 4.29        | 4.23        | 4.37        | 0.01         | 4.15***        | 4.43            | 4.29        | 0.000        |
| <b>Financial Benefits (beta 0.18)</b>                                                                                      |       | <b>3.12</b> | <b>3.13</b> | <b>3.10</b> | <b>0.501</b> | <b>3.10*</b>   | <b>3.31 †††</b> | <b>3.02</b> | <b>0.000</b> |
| The ability to buy a nice house                                                                                            | 0.897 | 3.20        | 3.29        | 3.08        | 0.002        | 3.26#          | 3.38 †††        | 3.06        | 0.000        |
| Making a lot of money                                                                                                      | 0.847 | 2.96        | 3.12        | 2.75        | 0.000        | 3.11###        | 3.18 †††        | 2.76        | 0.000        |
| The ability to hire a nanny or pay for private daycare/school                                                              | 0.730 | 2.91        | 2.76        | 3.10        | 0.000        | 2.75**         | 3.09            | 2.89        | 0.01         |
| The need to repay significant loans                                                                                        | 0.540 | 3.42        | 3.36        | 3.49        |              | 3.31*          | 3.61            | 3.37        | 0.05         |
| <b>Professional Challenges (beta 0.14)</b>                                                                                 |       | <b>3.03</b> | <b>3.10</b> | <b>2.94</b> | <b>0.001</b> | <b>3.32###</b> | <b>3.20 †††</b> | <b>2.79</b> | <b>0.000</b> |
| Concern that I might not be accepted into the fellowship program of my choice                                              | 0.777 | 3.13        | 3.18        | 3.05        | 0.102        | 3.30###        | 3.52 †††        | 2.80        | 0.000        |
| The desire for a less competitive application process                                                                      | 0.688 | 2.91        | 2.94        | 2.86        | 0.281        | 2.89**         | 3.24 †††        | 2.72        | 0.000        |
| The opportunity to perform procedures                                                                                      | 0.543 | 3.47        | 3.70        | 3.18        | 0.000        | 4.29***##<br># | 3.58 †††        | 3.00        | 0.000        |
| Seeing patients in a short-term, consultative capacity                                                                     | 0.451 | 3.14        | 3.26        | 3.00        | 0.000        | 3.51***###     | 3.22 †††        | 2.92        | 0.000        |

|                                                                 |       |             |             |             |              |                  |                 |             |              |
|-----------------------------------------------------------------|-------|-------------|-------------|-------------|--------------|------------------|-----------------|-------------|--------------|
| The possibility of radiation exposure                           | 0.327 | 2.49        | 2.37        | 2.63        | 0.000        | 2.57             | 2.46            | 2.47        | 0.455        |
| <b>Patient Focus (beta 0.11)</b>                                |       | <b>3.63</b> | <b>3.56</b> | <b>3.73</b> | <b>0.001</b> | <b>3.73</b>      | <b>3.59</b>     | <b>3.61</b> | <b>0.105</b> |
| Having long-term relationships with my patients                 | 0.834 | 3.89        | 3.84        | 3.96        | 0.038        | 4.02*            | 3.81            | 3.88        | 0.034        |
| Tending to patients' social and psychological needs             | 0.779 | 3.42        | 3.30        | 3.57        | 0.000        | 3.28             | 3.42            | 3.48        | 0.057        |
| Addressing issues in preventative medicine                      | 0.648 | 3.59        | 3.54        | 3.65        | 0.078        | 3.88**###        | 3.55            | 3.46        | 0.000        |
| <b>Stimulating Career (beta 0.03)</b>                           |       | <b>3.71</b> | <b>3.84</b> | <b>3.54</b> | <b>0.000</b> | <b>4.16***##</b> | <b>3.73 †††</b> | <b>3.47</b> | <b>0.000</b> |
| Desire to be a trendsetter                                      | 0.814 | 3.01        | 3.27        | 2.68        | 0.000        | 3.51***##        | 3.09 †††        | 2.71        | 0.000        |
| Desire to pursue a challenge                                    | 0.793 | 3.97        | 4.05        | 3.87        | 0.001        | 4.32***##        | 3.94            | 3.81        | 0.000        |
| Desire to pursue a career that not just anyone can do           | 0.756 | 3.49        | 3.63        | 3.31        | 0.000        | 3.89**###        | 3.57 †††        | 3.23        | 0.000        |
| A desire to make important scientific contributions to my field | 0.735 | 3.49        | 3.67        | 3.27        | 0.000        | 4.03***##        | 3.51 ††         | 3.22        | 0.000        |
| Being an expert in a specific topic                             | 0.534 | 4.08        | 4.17        | 3.96        | 0.000        | 4.52***##        | 4.08 ††         | 3.86        | 0.000        |
| Caring for critically ill patients                              | 0.373 | 3.35        | 3.52        | 3.14        | 0.000        | 4.13***##        | 3.38 †††        | 2.94        | 0.000        |
| The subject matter of my field of choice                        | 0.327 | 4.54        | 4.53        | 4.56        | 0.446        | 4.70***##        | 4.49            | 4.49        | 0.000        |

Factor categories (**bold**) are shown in descending order of the beta coefficient in an 8-factor model explaining 59% of the variance. Betas were calculated by forcing the career importance statements into one factor then conducting a linear regression of the 8-factor solution on the single factor. Within each category, individual questions are shown in descending order of weight within that factor category. All values other than factor weight represent mean response on a 5-point Likert scale, in which 1 = not important and 5 = very important.

Statistical significance indicators are the same as Table 1.



eTable 3: Agreement with Perceptions of the Cardiology Field

|                                                                          | Factor Loading  | All respondents | Sex         |               |              | Cardiology Choice          |                               |                                     |              |
|--------------------------------------------------------------------------|-----------------|-----------------|-------------|---------------|--------------|----------------------------|-------------------------------|-------------------------------------|--------------|
|                                                                          | All respondents | (n=1123)        | Men (n=625) | Women (n=494) | P value      | Current cardiology (n=267) | Considered cardiology (n=312) | Never considered cardiology (n=542) | P value      |
| <b>Adverse job conditions (beta 0.566)</b>                               |                 | <b>3.14</b>     | <b>3.09</b> | <b>3.20</b>   | <b>0.034</b> | <b>3.02**</b>              | <b>3.23</b>                   | <b>3.15</b>                         | <b>0.009</b> |
| There is too much overnight call in cardiology                           | 0.856           | 3.21            | 3.19        | 3.24          | 0.441        | 3.02***#                   | 3.35                          | 3.23                                | 0.001        |
| Cardiology fellowship is too “demanding.”                                | 0.835           | 3.23            | 3.16        | 3.31          | 0.019        | 2.99***##                  | 3.35                          | 3.27                                | 0.000        |
| Schedule of a practicing cardiologist is too unpredictable               | 0.712           | 3.32            | 3.31        | 3.32          | 0.873        | 3.21*                      | 3.45                          | 3.29                                | 0.012        |
| Exposure to radiation in cardiology is a concern                         | 0.306           | 2.83            | 2.73        | 2.95          | 0.002        | 2.88                       | 2.80                          | 2.82                                | 0.640        |
| <b>Interferes with family life (beta 0.534)</b>                          |                 | <b>3.77</b>     | <b>3.65</b> | <b>3.92</b>   | <b>0.000</b> | <b>3.53***###</b>          | <b>3.86</b>                   | <b>3.84</b>                         | <b>0.001</b> |
| Being a cardiology fellow would be easier for individuals who are single | 0.761           | 3.84            | 3.81        | 3.88          | 0.279        | 3.63***##                  | 3.93                          | 3.90                                | 0.002        |
| It would be challenging to have children during cardiology fellowship    | 0.758           | 3.86            | 3.69        | 4.06          | 0.000        | 3.56***###                 | 3.96                          | 3.95                                | 0.000        |
| Family responsibilities can interfere                                    | 0.732           | 3.75            | 3.70        | 3.82          | 0.54         | 3.47***###                 | 3.85                          | 3.84                                | 0.000        |

|                                                                                   |       |             |             |             |              |                   |             |             |              |
|-----------------------------------------------------------------------------------|-------|-------------|-------------|-------------|--------------|-------------------|-------------|-------------|--------------|
| with training in cardiology                                                       |       |             |             |             |              |                   |             |             |              |
| Cardiology is a “male-dominated” field                                            | 0.668 | 3.64        | 3.42        | 3.91        | 0.000        | 3.47#             | 3.68        | 3.71        | 0.011        |
| <b>Not diverse (beta 0.180)</b>                                                   |       | <b>3.09</b> | <b>3.03</b> | <b>3.17</b> | <b>0.031</b> | <b>3.04</b>       | <b>3.19</b> | <b>3.06</b> | <b>0.136</b> |
| There is a need to increase awareness in medicine of issues in race and ethnicity | 0.872 | 3.28        | 3.21        | 3.38        | 0.024        | 3.23              | 3.34        | 3.27        | 0.498        |
| There is not enough racial and ethnic representation in cardiology                | 0.854 | 2.94        | 2.86        | 3.04        | 0.013        | 2.84              | 3.07        | 2.92        | 0.049        |
| <b>CV Role Model/Positive Role Models (beta 0.162)</b>                            |       | <b>3.74</b> | <b>3.79</b> | <b>3.66</b> | <b>0.022</b> | <b>4.03***###</b> | <b>3.67</b> | <b>3.61</b> | <b>0.000</b> |
| I have met positive female role models in cardiology                              | 0.825 | 3.41        | 3.41        | 3.40        | 0.830        | 3.68**###         | 3.35        | 3.30        | 0.000        |
| I have met positive role models in cardiology                                     | 0.822 | 4.11        | 4.16        | 4.05        | 0.058        | 4.47***###        | 4.08        | 3.93        | 0.000        |
| I have met positive role models of my race/ethnicity in cardiology                | 0.747 | 3.70        | 3.82        | 3.54        | 0.000        | 3.93***##         | 3.62        | 3.61        | 0.002        |
| <b>Compensation and work integration (beta 0.072)</b>                             |       | <b>3.60</b> | <b>3.57</b> | <b>3.62</b> | <b>0.212</b> | <b>3.74***###</b> | <b>3.54</b> | <b>3.55</b> | <b>0.000</b> |
| Salaries of academic cardiologists are reasonable                                 | 0.801 | 3.49        | 3.37        | 3.65        | 0.000        | 3.35##            | 3.49        | 3.57        | 0.008        |
| Salaries of cardiologists in private practice are reasonable                      | 0.788 | 3.89        | 3.88        | 3.92        | 0.580        | 4.06##            | 3.89        | 3.81        | 0.005        |
| The length of training in cardiology is reasonable                                | 0.512 | 3.56        | 3.49        | 3.64        | 0.013        | 3.52              | 3.53        | 3.59        | 0.473        |

|                                                                                            |       |      |      |      |       |            |         |      |       |
|--------------------------------------------------------------------------------------------|-------|------|------|------|-------|------------|---------|------|-------|
| In cardiology, it is possible to have both a rewarding career and a successful family life | 0.327 | 3.46 | 3.56 | 3.33 | 0.000 | 4.00***### | 3.28    | 3.28 | 0.000 |
| <b>Intellectually stimulating (beta 0.004)</b>                                             |       |      |      |      |       |            |         |      |       |
| I like cardiac pathophysiology                                                             | 0.877 | 3.92 | 4.07 | 3.74 | 0.000 | 4.70***### | 4.12### | 3.39 | 0.000 |
| <b>No Category</b>                                                                         |       |      |      |      |       |            |         |      |       |
| I have been discouraged from choosing a career in cardiology                               |       | 2.19 | 2.22 | 2.15 | 0.308 | 2.13***    | 2.53### | 2.01 | 0.000 |

Factor categories (bold text) are shown in descending order of the beta coefficient in a 6-factor model explaining 62% of the variance. Within each category, individual questions are shown in descending order of weight within that factor category. Betas were calculated by forcing the perceptions of cardiology statements into one factor then conducting a multifactor linear regression of the 6-factor solution on the single factor. All values other than factor weight represent mean response on a 5-point Likert scale, in which 1 = strongly disagree and 5 = strongly agree. Statistical significance indicators are the same as Table 1.

Appendix

Internal Medicine Residents Survey – 2009-2010

**The following survey is to help understand the factors that influence fellowship decision-making with a particular focus on cardiology. You do *not* have to be applying for a cardiology fellowship to participate. Survey responses will be confidential. Thank you for your participation.**

Please indicate your likelihood to pursue the following career plans:

| Q.1                                             | Not at all<br>likely - 1 | 2                     | 3                     | 4                     | Definitely<br>Likely - 5 | N/A                   |
|-------------------------------------------------|--------------------------|-----------------------|-----------------------|-----------------------|--------------------------|-----------------------|
| Likelihood to pursue a fellowship               | <input type="radio"/>    | <input type="radio"/> | <input type="radio"/> | <input type="radio"/> | <input type="radio"/>    | <input type="radio"/> |
| Likelihood to pursue a cardiology<br>fellowship | <input type="radio"/>    | <input type="radio"/> | <input type="radio"/> | <input type="radio"/> | <input type="radio"/>    | <input type="radio"/> |
| Likelihood to pursue an academic career         | <input type="radio"/>    | <input type="radio"/> | <input type="radio"/> | <input type="radio"/> | <input type="radio"/>    | <input type="radio"/> |
| Likelihood to enter private practice            | <input type="radio"/>    | <input type="radio"/> | <input type="radio"/> | <input type="radio"/> | <input type="radio"/>    | <input type="radio"/> |

(End of Page 1 )

---

**The next series of questions investigates the importance of various factors in your professional development. Please rate the importance of each factor to you personally:**

Lifestyle Issues

| Q.2                                                                                  | Not at all<br>important-1 | 2                     | 3                     | 4                     | Extremely<br>Important-5 | N/A                   |
|--------------------------------------------------------------------------------------|---------------------------|-----------------------|-----------------------|-----------------------|--------------------------|-----------------------|
| Having a supportive role model or mentor in my field of choice                       | <input type="radio"/>     | <input type="radio"/> | <input type="radio"/> | <input type="radio"/> | <input type="radio"/>    | <input type="radio"/> |
| Having a supportive <i>female</i> role model or mentor in my field of choice         | <input type="radio"/>     | <input type="radio"/> | <input type="radio"/> | <input type="radio"/> | <input type="radio"/>    | <input type="radio"/> |
| Having a supportive role model or mentor of my race/ethnicity in my field of choice  | <input type="radio"/>     | <input type="radio"/> | <input type="radio"/> | <input type="radio"/> | <input type="radio"/>    | <input type="radio"/> |
| Seeing role models in my field of choice who successfully balance their professional | <input type="radio"/>     | <input type="radio"/> | <input type="radio"/> | <input type="radio"/> | <input type="radio"/>    | <input type="radio"/> |

and personal responsibilities

Having received positive encouragement to pursue my field of choice

Family.

| Q.3                                                                                                                        | Not at all<br>important-1 | 2                     | 3                     | 4                     | Extremely<br>Important-5 | N/A                   |
|----------------------------------------------------------------------------------------------------------------------------|---------------------------|-----------------------|-----------------------|-----------------------|--------------------------|-----------------------|
| Having fellowship programs in my field of choice appreciate the need to balance professional and personal responsibilities | <input type="radio"/>     | <input type="radio"/> | <input type="radio"/> | <input type="radio"/> | <input type="radio"/>    | <input type="radio"/> |
| The desire for a “female-friendly” profession                                                                              | <input type="radio"/>     | <input type="radio"/> | <input type="radio"/> | <input type="radio"/> | <input type="radio"/>    | <input type="radio"/> |
| The desire for a “family-friendly” profession                                                                              | <input type="radio"/>     | <input type="radio"/> | <input type="radio"/> | <input type="radio"/> | <input type="radio"/>    | <input type="radio"/> |
| Program where on-site daycare is available                                                                                 | <input type="radio"/>     | <input type="radio"/> | <input type="radio"/> | <input type="radio"/> | <input type="radio"/>    | <input type="radio"/> |
| Fellowship program where taking maternity/paternity leave is accepted                                                      | <input type="radio"/>     | <input type="radio"/> | <input type="radio"/> | <input type="radio"/> | <input type="radio"/>    | <input type="radio"/> |
| The possibility of radiation exposure                                                                                      | <input type="radio"/>     | <input type="radio"/> | <input type="radio"/> | <input type="radio"/> | <input type="radio"/>    | <input type="radio"/> |
| Having children in the next 5 years                                                                                        | <input type="radio"/>     | <input type="radio"/> | <input type="radio"/> | <input type="radio"/> | <input type="radio"/>    | <input type="radio"/> |
| Having time to spend with my family/children                                                                               | <input type="radio"/>     | <input type="radio"/> | <input type="radio"/> | <input type="radio"/> | <input type="radio"/>    | <input type="radio"/> |
| Having family support nearby during training                                                                               | <input type="radio"/>     | <input type="radio"/> | <input type="radio"/> | <input type="radio"/> | <input type="radio"/>    | <input type="radio"/> |
| Having a spouse with a flexible schedule                                                                                   | <input type="radio"/>     | <input type="radio"/> | <input type="radio"/> | <input type="radio"/> | <input type="radio"/>    | <input type="radio"/> |

(End of Page 2 )

Process/Interest

| Q.4                                           | Not at all<br>important-1 | 2                     | 3                     | 4                     | Extremely<br>Important-5 | N/A                   |
|-----------------------------------------------|---------------------------|-----------------------|-----------------------|-----------------------|--------------------------|-----------------------|
| The ability to work part-time                 | <input type="radio"/>     | <input type="radio"/> | <input type="radio"/> | <input type="radio"/> | <input type="radio"/>    | <input type="radio"/> |
| The ability to have a flexible schedule       | <input type="radio"/>     | <input type="radio"/> | <input type="radio"/> | <input type="radio"/> | <input type="radio"/>    | <input type="radio"/> |
| The ability to have stable, predictable hours | <input type="radio"/>     | <input type="radio"/> | <input type="radio"/> | <input type="radio"/> | <input type="radio"/>    | <input type="radio"/> |
| Having limited work hours during training     | <input type="radio"/>     | <input type="radio"/> | <input type="radio"/> | <input type="radio"/> | <input type="radio"/>    | <input type="radio"/> |
| The amount of overnight call                  | <input type="radio"/>     | <input type="radio"/> | <input type="radio"/> | <input type="radio"/> | <input type="radio"/>    | <input type="radio"/> |

| Q.5                                                                           | Not at all<br>important-1 | 2                     | 3                     | 4                     | Extremely<br>Important-5 | N/A                   |
|-------------------------------------------------------------------------------|---------------------------|-----------------------|-----------------------|-----------------------|--------------------------|-----------------------|
| The desire for a less competitive application process                         | <input type="radio"/>     | <input type="radio"/> | <input type="radio"/> | <input type="radio"/> | <input type="radio"/>    | <input type="radio"/> |
| Concern that I might not be accepted into the fellowship program of my choice | <input type="radio"/>     | <input type="radio"/> | <input type="radio"/> | <input type="radio"/> | <input type="radio"/>    | <input type="radio"/> |

| Q.6                                                             | Not at all<br>important-1 | 2                     | 3                     | 4                     | Extremely<br>Important-5 | N/A                   |
|-----------------------------------------------------------------|---------------------------|-----------------------|-----------------------|-----------------------|--------------------------|-----------------------|
| The opportunity to perform procedures                           | <input type="radio"/>     | <input type="radio"/> | <input type="radio"/> | <input type="radio"/> | <input type="radio"/>    | <input type="radio"/> |
| The subject matter of my field of choice                        | <input type="radio"/>     | <input type="radio"/> | <input type="radio"/> | <input type="radio"/> | <input type="radio"/>    | <input type="radio"/> |
| Having long-term relationships with my patients                 | <input type="radio"/>     | <input type="radio"/> | <input type="radio"/> | <input type="radio"/> | <input type="radio"/>    | <input type="radio"/> |
| Being an expert in a specific topic                             | <input type="radio"/>     | <input type="radio"/> | <input type="radio"/> | <input type="radio"/> | <input type="radio"/>    | <input type="radio"/> |
| Tending to patients' social and psychological needs             | <input type="radio"/>     | <input type="radio"/> | <input type="radio"/> | <input type="radio"/> | <input type="radio"/>    | <input type="radio"/> |
| Seeing patients in a short-term, consultative capacity          | <input type="radio"/>     | <input type="radio"/> | <input type="radio"/> | <input type="radio"/> | <input type="radio"/>    | <input type="radio"/> |
| Caring for critically ill patients                              | <input type="radio"/>     | <input type="radio"/> | <input type="radio"/> | <input type="radio"/> | <input type="radio"/>    | <input type="radio"/> |
| Addressing issues in preventative medicine                      | <input type="radio"/>     | <input type="radio"/> | <input type="radio"/> | <input type="radio"/> | <input type="radio"/>    | <input type="radio"/> |
| A desire to make important scientific contributions to my field | <input type="radio"/>     | <input type="radio"/> | <input type="radio"/> | <input type="radio"/> | <input type="radio"/>    | <input type="radio"/> |

Prestige.

| Q.7                                                   | Not at all<br>important-1 | 2                     | 3                     | 4                     | Extremely<br>Important-5 | N/A                   |
|-------------------------------------------------------|---------------------------|-----------------------|-----------------------|-----------------------|--------------------------|-----------------------|
| Desire to be a trendsetter                            | <input type="radio"/>     | <input type="radio"/> | <input type="radio"/> | <input type="radio"/> | <input type="radio"/>    | <input type="radio"/> |
| Desire to pursue a challenge                          | <input type="radio"/>     | <input type="radio"/> | <input type="radio"/> | <input type="radio"/> | <input type="radio"/>    | <input type="radio"/> |
| Desire to pursue a career that not just anyone can do | <input type="radio"/>     | <input type="radio"/> | <input type="radio"/> | <input type="radio"/> | <input type="radio"/>    | <input type="radio"/> |

Income.

| Q.8                                                           | Not at all<br>important-1 | 2                     | 3                     | 4                     | Extremely<br>Important-5 | N/A                   |
|---------------------------------------------------------------|---------------------------|-----------------------|-----------------------|-----------------------|--------------------------|-----------------------|
| Making a lot of money                                         | <input type="radio"/>     | <input type="radio"/> | <input type="radio"/> | <input type="radio"/> | <input type="radio"/>    | <input type="radio"/> |
| The ability to buy a nice house                               | <input type="radio"/>     | <input type="radio"/> | <input type="radio"/> | <input type="radio"/> | <input type="radio"/>    | <input type="radio"/> |
| The ability to hire a nanny or pay for private daycare/school | <input type="radio"/>     | <input type="radio"/> | <input type="radio"/> | <input type="radio"/> | <input type="radio"/>    | <input type="radio"/> |
| The need to repay significant loans                           | <input type="radio"/>     | <input type="radio"/> | <input type="radio"/> | <input type="radio"/> | <input type="radio"/>    | <input type="radio"/> |

(End of Page 3 )

How much do you agree or disagree with the following statements:

Q.9 Strongly Strongly

|                                                                                 | Disagree 1            | 2                     | 3                     | 4                     | Agree 5               | N/A                   |
|---------------------------------------------------------------------------------|-----------------------|-----------------------|-----------------------|-----------------------|-----------------------|-----------------------|
| Family responsibilities can interfere with training in cardiology               | <input type="radio"/> |
| It would be challenging to have children during cardiology fellowship           | <input type="radio"/> |
| Exposure to radiation in cardiology is a concern                                | <input type="radio"/> |
| Being a cardiology fellow would be easier for individuals who are <i>single</i> | <input type="radio"/> |
| Cardiology is a “male-dominated” field                                          | <input type="radio"/> |
| I have met positive role models in cardiology                                   | <input type="radio"/> |
| I have met positive <i>female</i> role models in cardiology                     | <input type="radio"/> |
| I have met positive role models of my race/ethnicity in cardiology              | <input type="radio"/> |
| I have been discouraged from choosing a career in cardiology                    | <input type="radio"/> |
| The length of training in cardiology is reasonable                              | <input type="radio"/> |

How much do you agree or disagree with the following statements:

| Q.10                                                                                       | Strongly<br>Disagree 1 | 2                     | 3                     | 4                     | Strongly<br>Agree 5   | N/A                   |
|--------------------------------------------------------------------------------------------|------------------------|-----------------------|-----------------------|-----------------------|-----------------------|-----------------------|
| Cardiology fellowship is too “demanding.”                                                  | <input type="radio"/>  | <input type="radio"/> | <input type="radio"/> | <input type="radio"/> | <input type="radio"/> | <input type="radio"/> |
| There is too much overnight call in cardiology                                             | <input type="radio"/>  | <input type="radio"/> | <input type="radio"/> | <input type="radio"/> | <input type="radio"/> | <input type="radio"/> |
| I like cardiac pathophysiology                                                             | <input type="radio"/>  | <input type="radio"/> | <input type="radio"/> | <input type="radio"/> | <input type="radio"/> | <input type="radio"/> |
| Schedule of a practicing cardiologist is too unpredictable                                 | <input type="radio"/>  | <input type="radio"/> | <input type="radio"/> | <input type="radio"/> | <input type="radio"/> | <input type="radio"/> |
| In cardiology, it is possible to have both a rewarding career and a successful family life | <input type="radio"/>  | <input type="radio"/> | <input type="radio"/> | <input type="radio"/> | <input type="radio"/> | <input type="radio"/> |
| Salaries of academic cardiologists are reasonable                                          | <input type="radio"/>  | <input type="radio"/> | <input type="radio"/> | <input type="radio"/> | <input type="radio"/> | <input type="radio"/> |
| Salaries of cardiologists in private practice are reasonable                               | <input type="radio"/>  | <input type="radio"/> | <input type="radio"/> | <input type="radio"/> | <input type="radio"/> | <input type="radio"/> |
| There is not enough racial and ethnic representation in cardiology                         | <input type="radio"/>  | <input type="radio"/> | <input type="radio"/> | <input type="radio"/> | <input type="radio"/> | <input type="radio"/> |
| There is a need to increase awareness in medicine of issues in race and ethnicity          | <input type="radio"/>  | <input type="radio"/> | <input type="radio"/> | <input type="radio"/> | <input type="radio"/> | <input type="radio"/> |

(End of Page 4 )

---

**Please answer the following demographic questions**

11. Gender

- Male
- Female

12. Age \_\_\_\_\_

13. Year of College Graduation \_\_\_\_\_

14. College Major \_\_\_\_\_

15. Year of Medical School Graduation \_\_\_\_\_

16. Race/Ethnicity

Caucasian

African American

Asian

Hispanic

Native American

Other \_\_\_\_\_

17. Degrees (Check all that apply)

MD

PhD

MPH

JD

MBA

Other: \_\_\_\_\_

18. What is your current medical track

Categorical

Preliminary

Primary Care

Med/Peds

19. What is your level of training?

Intern

Junior Resident

Senior Resident

Other \_\_\_\_\_



20. (answer required)

What is the name of your hospital/training program? \_\_\_\_\_

21. In what country did you attend medical school?

Country: \_\_\_\_\_

(End of Page 5 )

---

22. What is your marital status? (required)

- Single SKIP TO Q.28
- Have a significant other
- Married
- Divorced/Separated SKIP TO Q.28
- Other \_\_\_\_\_ SKIP TO Q.28

(End of Page 6 )

---

23. Does your spouse or significant other work outside the home? (required)

- Yes
- No SKIP TO Q.28

(End of Page 7 )

---

24. What kind of work does your spouse do? \_\_\_\_\_

25. How many hours does your spouse work per week?

- Less than 40 hours
- 41-59 hours
- 60 or more hours

26. Your spouse's work schedule is:

- Full time

Part Time

27. Your spouse's work schedule is:

- Flexible
- Not flexible

(End of Page 8 )

---

28. Do you have any children?<sup>(required)</sup>

- Yes
- No SKIP TO Q.35

(End of Page 9 )

---

29. How many children do you have? \_\_\_\_\_

30. Do you plan to have more children in the future?

- Yes
- No
- Not sure

31. At what stage of your training did you first have children?

- Undergraduate
- Medical School
- Residency
- Other \_\_\_\_\_

32. What are your child care arrangements (select all that apply)?

- Spouse is primary caretaker
- Daycare
- Nanny
- Relatives
- Other \_\_\_\_\_

33. Do you have family members/others who help with the care of your children?

- Yes
- No

34. Do you have financial support from family members/others?

- Yes
- No

GO TO Q.36

(End of Page 10 )

---

35. ASK IF CURRENTLY DO NOT HAVE CHILDREN Do you plan to have children in the future?

- Yes
- No
- Not sure

(End of Page 11 )

---

36. What is your household's estimated annual income?

- Less than \$100,000/year
- \$100,000-\$200,000/year
- More than \$200,000/year

37. What specific area of medicine do you plan to pursue?

- Adolescent medicine
- Allergy and immunology
- Cardiovascular disease
- Clinical cardiac electrophysiology
- Critical care medicine
- Endocrinology, diabetes, and metabolism
- Gastroenterology
- General Internal Medicine
- Geriatric medicine
- Hematology
- Hospice and palliative medicine

- Infectious disease
- Interventional cardiology
- Medical oncology
- Nephrology
- Primary Care
- Pulmonary disease
- Rheumatology
- Sleep medicine
- Sports medicine
- Transplant hepatology
- Basic science
- Other medical subspecialty: (please specify)
- Non-medical field
- Undecided

38. Have you ever planned on pursuing a career in cardiology in the past if you are not currently?

- Yes
- No

39. Finally, please provide us with an explanation of the key factors that influenced your subspecialty choice.

---



---



---

(End of Page 12 )

---

To thank you for participation in this research we would like to offer you the opportunity to be included in a drawing for 1 of 10 iPod Touches. If you would like to be included in the drawing please provide your name and email address below. This information will not be utilized for any other purpose.

Name \_\_\_\_\_

Email Address \_\_\_\_\_

(End of Page 13 )
